# Supplementary material
Source: PubMed Central journal article supplement (PMC7132794)
Supplement: mmc1.pdf [file mmc1.pdf]

**YMTHE, Volume 28**

**Supplemental Information**

**The 3' Untranslated Region Protects the Heart  
from Angiotensin II-Induced Cardiac Dysfunction  
via AGGF1 Expression**

**Lexi Ding, Shan Lu, Yu Zhou, Dayin Lyu, Chaghan Ouyang, Zejun Ma, and Qiulun Lu**

Supplemental Figures

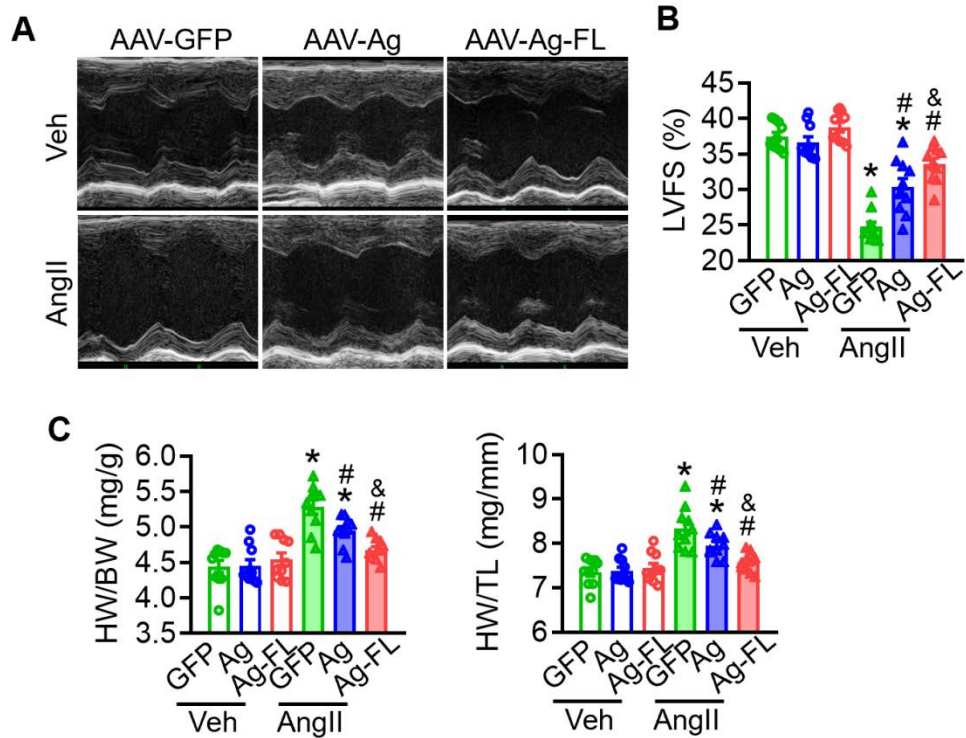

**Figure S1. *Aggf1* 3'-UTR enhances the cardio-protective role of *Aggf1* in dysfunctional heart.** 8 weeks old mice were infused with vehicle or AngII. One weeks after mini-pump implantation, the mice were injected intravenously with AAV-GFP, AAV-Ag, or AAV-Ag-FL once per week for 5 weeks (n = 10 each group). (A) Representative M-mode echocardiograms for each group. (B) LVFS levels were shown from these six group mice. (C) Ratios of heart weight to body weight (HW/BW) and heart weight to tibia length (HW/TL) were shown. \* vs Veh,  $p < 0.05$ ; # vs AAV-GFP,  $p < 0.05$ ; & vs AAV-Ag,  $p < 0.05$ .

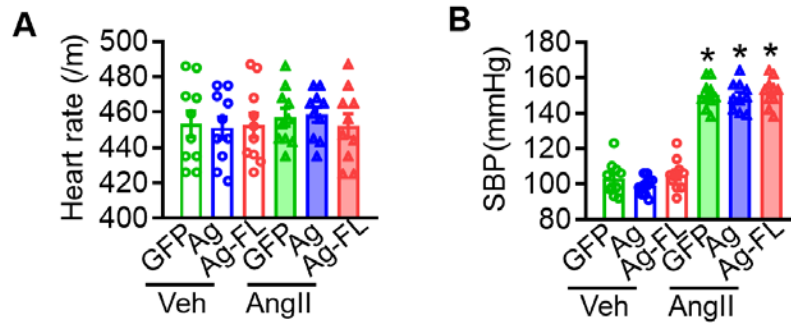

**Figure S2. Neither heart rates nor blood pressures are affected after AAV-Ag or AAV-Ag-FL administration.** Mice were infused with vehicle or AngII. One weeks after mini-pump implantation, the mice were injected intravenously with AAV-GFP, AAV-Ag, or AAV-Ag-FL once per week for 5 weeks. (A) Administration of either AAV-Ag or AAV-Ag-FL did not affect the heart rates in AngII-infused mice. (B) Systolic blood pressure (SBP) was measured. Statistical analysis was carried out by a Student's t-test.  $n = 10$ , \* vs Veh,  $p < 0.05$ .

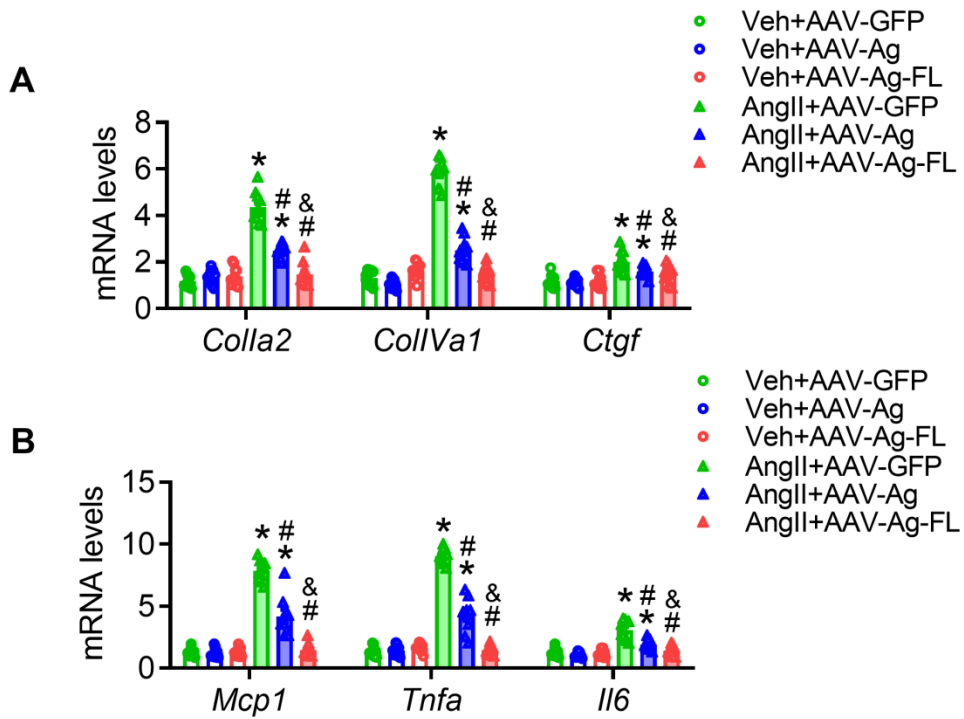

**Figure S3. Inflammatory response and fibrosis are repressed by AAV-Ag and AAV-Ag-FL.** Mice were infused with vehicle or AngII. One weeks after mini-pump implantation, the mice were injected intravenously with AAV-GFP, AAV-Ag, or AAV-Ag-FL once per week for 5 weeks. The heart tissues from mice were collected. Realtime-PCR analysis was performed to detect cardiac fibrotic markers, including *Coll*, *ColIV*, and *Ctgf* (A), and cardiac inflammation markers, including *Mcp1*, *Tnfa*, and *Il6* (B). \* vs Veh,  $p < 0.05$ ; # vs AAV-GFP,  $p < 0.05$ ; & vs AAV-Ag,  $p < 0.05$ .

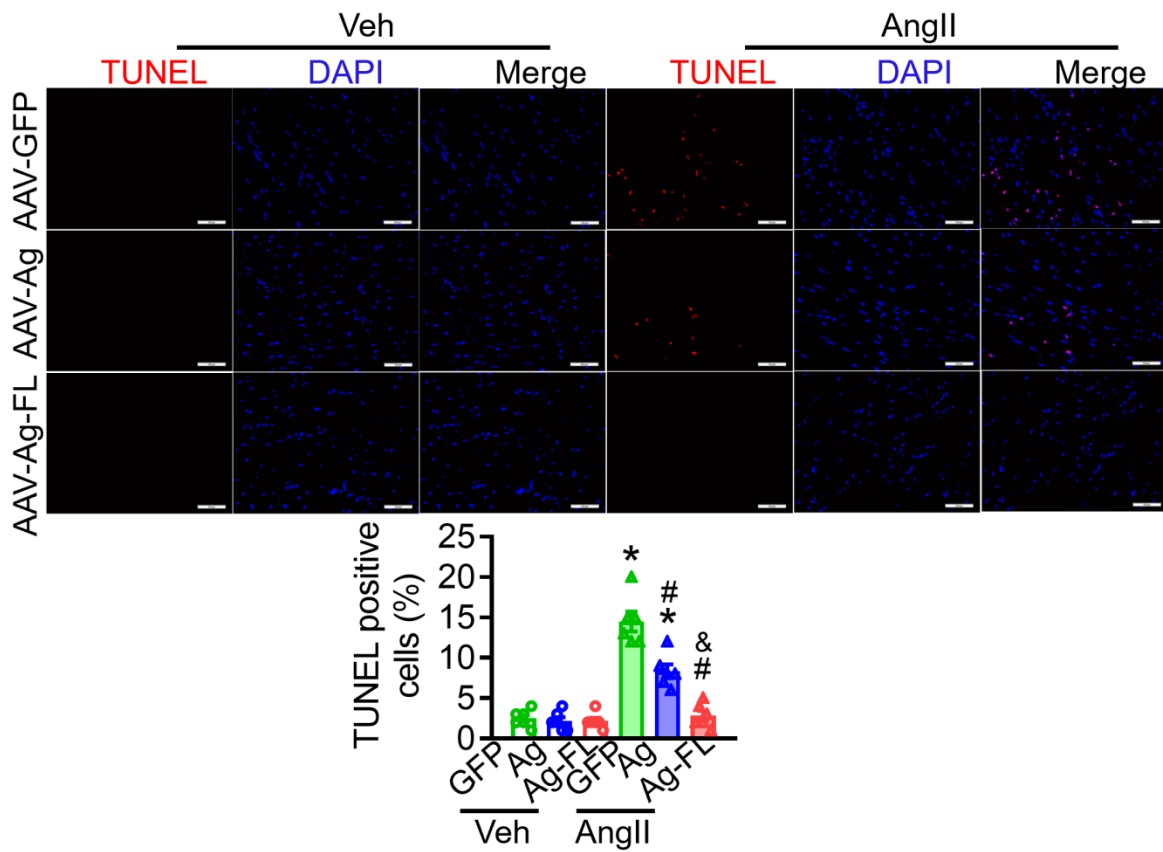

**Figure S4. Apoptosis of cardiomyocytes is affected by AAV-Ag or AAV-Ag-FL.** The representative images from TUNEL staining were shown in heart tissues from mice administrated with different AAVs.  $n = 6$ , \* vs Veh,  $p < 0.05$ ; # vs AAV-GFP,  $p < 0.05$ ; & vs AAV-Ag,  $p < 0.05$ .

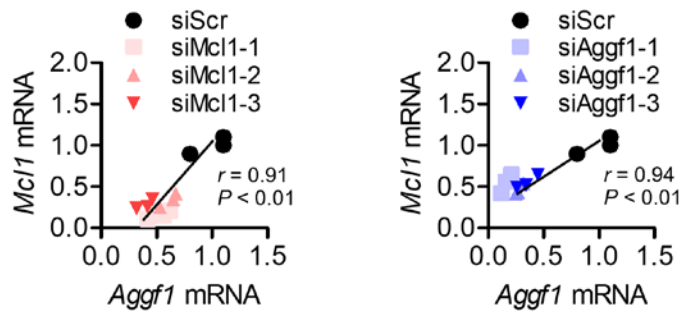

**Figure S5. The reduction of *Aggf1* mRNA is associated with *Mcl1* mRNA levels.** The isolated mouse neocardiomyocytes were transfected with Scramble siRNA, different siMcl1, or siAggf1 for 36 h. The association between *Aggf1* and *Mcl1* mRNA levels in *Mcl1* deficient or *Aggf1* deficient neocardiomyocytes was presented.

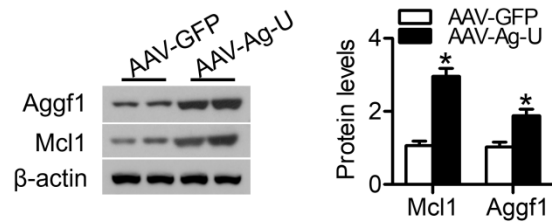

**Figure S6. The expression of *Agtf1* and *Mcl1* is regulated by *Agtf1* 3'-UTR in neocardiomyocytes.** The purified mouse neocardiomyocytes were cultured with AAV-GFP or AAV-Ag-U. Western blot assay was performed to analyze the levels of *Agtf1* and *Mcl1* expression. Statistical analysis was carried out by a Student's t-test.  $n = 6$ , \* vs AAV-GFP,  $p < 0.05$ .

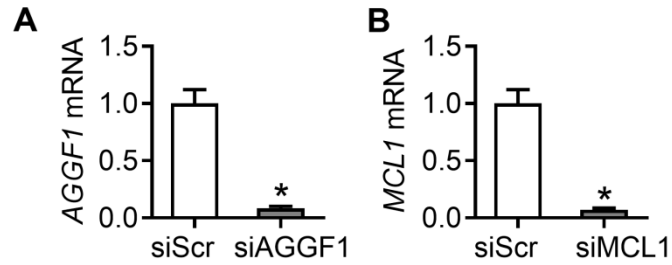

**Figure S7. The mRNA levels of *AGGF1* and *MCL1* after *AGGF1* and *MCL1* knockdown in HEK293 cells.** HEK293 cells were transfected with siScr, siAGGF1, or siMCL1. (A) Real-time PCR analysis for *AGGF1* mRNA level after *AGGF1* knockdown. (B) Real-time PCR analysis for *MCL1* mRNA level after *MCL1* knockdown. Statistical analysis was carried out by a Student's t-test. n = 6, \* vs siScr,  $p < 0.05$ .



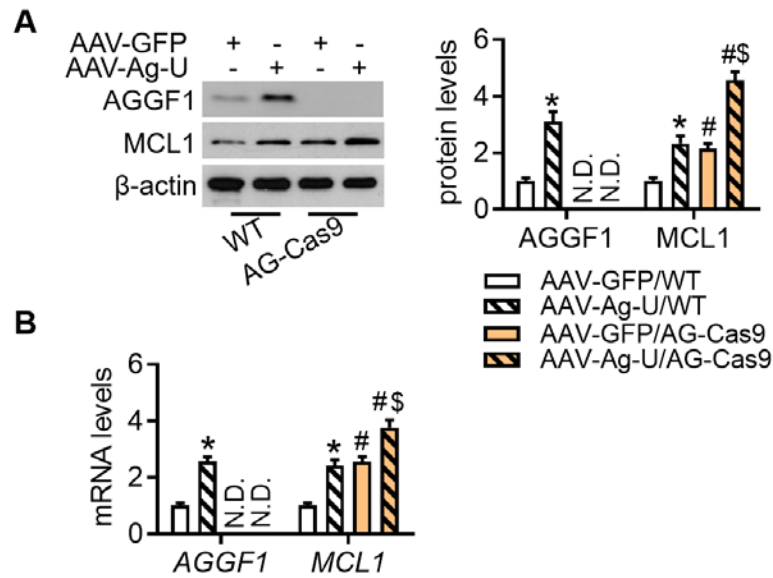

**Figure S8. *AGGF1* 3'-UTR causes the increase for *MCL1* expression in *AGGF1* deficient cells.** *AGGF1* deficient HEK293 cells were generated with Crispr/Cas9 method. The WT and *AGGF1* deficient HEK293 cells were incubated with AAV-GFP or AAV-Ag-U. Western blot (A) and real-time PCR analyses (B) were performed to detect *AGGF1* and *MCL1* expression after treatment. Statistical analysis was carried out by a Student's t-test.  $n = 3$ , \* vs AAV-GFP,  $p < 0.05$ ; # vs WT,  $p < 0.05$ ; \$ vs AAV-GFP/AG-Cas9,  $p < 0.05$ .

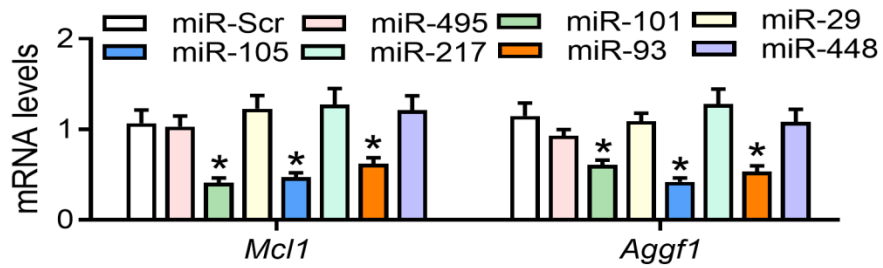

**Figure S9. The mRNA levels of *Mcl1* and *Aggf1* are detected after miRNAs overexpression.** The mRNA levels of *Aggf1* and *Mcl1* in mouse neocardiomyocytes after miRNAs transfection. Real-time PCR analysis was used to detect *Aggf1* and *Mcl1* mRNA levels. Statistical analysis was carried out by a Student's t-test. \* vs miR-Scr,  $p < 0.05$ .

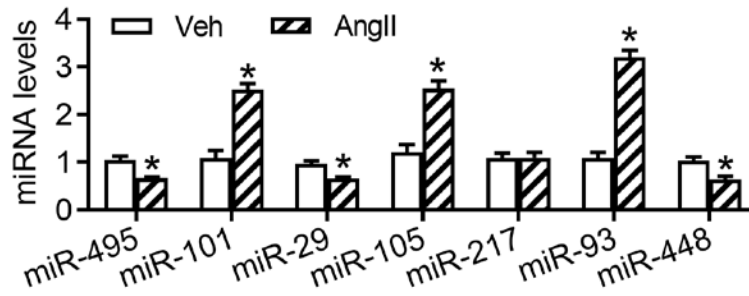

**Figure S10. The levels of predictive miRNA are analyzed in hearts from AngII-infused mouse.** The heart tissues were collected from mice infused with vehicle or AngII. Statistical analysis was carried out by a Student's t-test. \* vs Veh,  $p < 0.05$ .

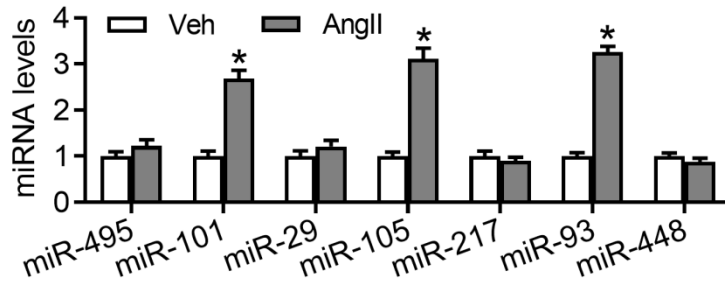

**Figure S11. The levels of predictive miRNA are analyzed in AngII-treated neocardiomyocytes.** Isolated mouse neocardiomyocytes were treated with AngII. The expression levels of predictive miRNAs were analyzed. Statistical analysis was carried out by a Student's t-test. n = 6, \* vs Veh,  $p < 0.05$ .

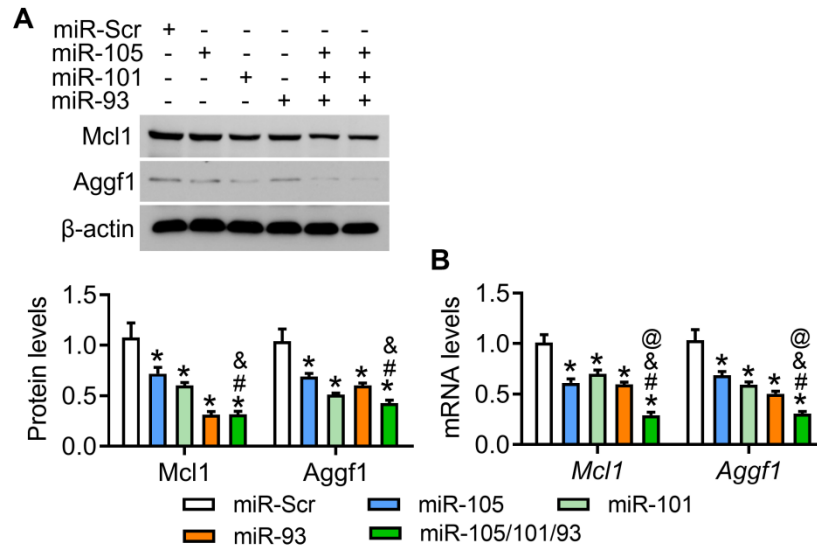

**Figure S12. The expression levels of Aggf1 and Mcl1 are analyzed after miRNAs transfection in neocardiomyocytes.** The purified mouse neocardiomyocytes were transfected with miR-105, miR-101, miR-93, or miR-105/101/93, respectively. Western blot (A) and real-time PCR analysis (B) were performed to detect Aggf1 and Mcl1 expression. Statistical analysis was carried out by a Student's t-test. n = 6, \* vs miScr,  $p < 0.05$ , # vs miR-105,  $p < 0.05$ , & vs miR-101,  $p < 0.05$ , @ vs miR-93,  $p < 0.05$ .

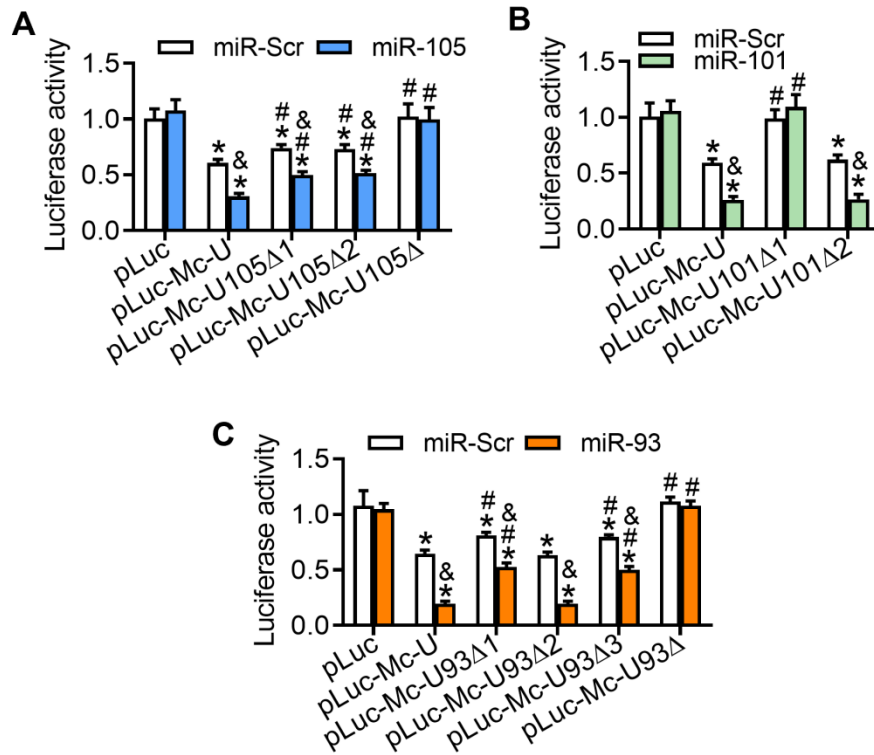

**Figure S13. miRNAs binding candidates along Mcl1 3'-UTR.** (A) The luciferase activities were measured in HEK293 cells transfected with different luciferase plasmids and miR-Scr or miR-105.  $n = 6$ , \* vs pLuc,  $p < 0.05$ ; # vs pLuc-Mc-U,  $p < 0.05$ ; & vs miR-Scr,  $p < 0.05$ . (B) The luciferase activities were measured in HEK293 cells transfected with different luciferase plasmids and miR-Scr or miR-101.  $n = 6$ , \* vs pLuc,  $p < 0.05$ ; # vs pLuc-Mc-U,  $p < 0.05$ ; & vs miR-Scr,  $p < 0.05$ . (C) The luciferase activities were measured in HEK293 cells transfected with different luciferase plasmids and miR-Scr or miR-93. Statistical analysis was carried out by a Student's t-test.  $n = 6$ , \* vs pLuc,  $p < 0.05$ ; # vs pLuc-Mc-U,  $p < 0.05$ ; & vs miR-Scr,  $p < 0.05$ .

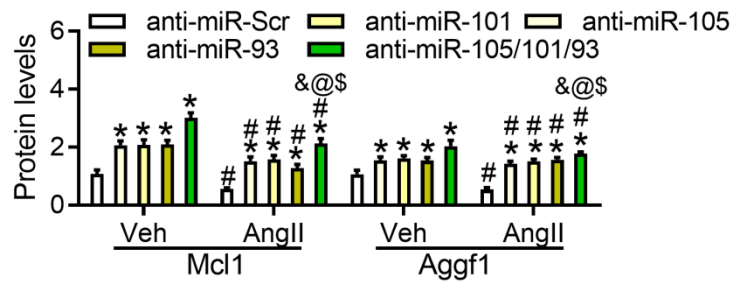

**Figure S14. The protein levels of Aggf1 and Mcl1 in AngII-treated neocardiomyocytes after miRNAs transfection are quantified.** Western blot analysis was performed to measure Aggf1 and Mcl1 expression after miRNA overexpression in purified mouse neocardiomyocytes. Aggf1 and Mcl1 levels were quantified by densitometric analysis of the Western blots. \* vs anti-miR-Scr,  $p < 0.05$ ; # vs Veh,  $p < 0.05$ ; & vs anti-miR-105,  $p < 0.05$ ; # vs anti-miR-101,  $p < 0.05$ ; # vs anti-miR-93,  $p < 0.05$ .

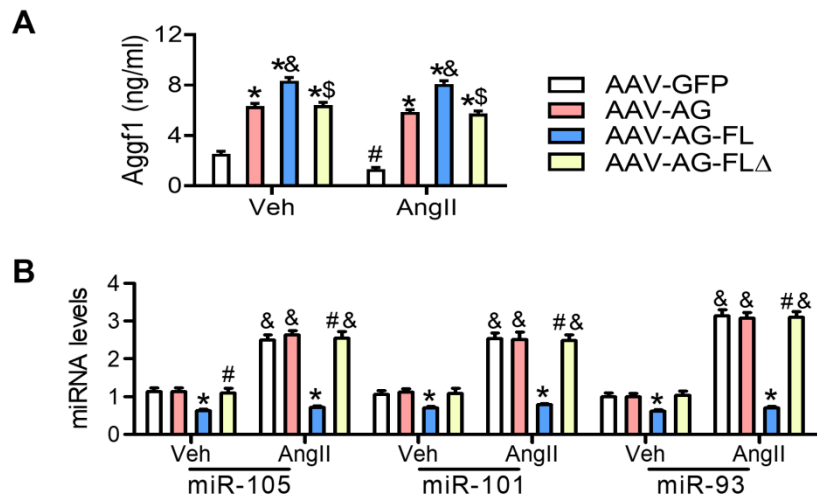

**Figure S15. Gene expression in AngII-treated cardiomyocytes after *Aggf1* 3'UTR transfection.** (A) The secretory *Aggf1* level was measured using ELISA assay. (B) The levels of miRNAs were measured by realtime-PCR analysis. n = 6, \* vs AAV-GFP,  $p < 0.05$ ; # vs Veh,  $p < 0.05$ ; & vs AAV-Ag,  $p < 0.05$ ; \$ vs AAV-Ag-FL,  $p < 0.05$ .



## Supplemental Tables

**Table S1. Echocardiograms for mice after AAVs administration.**

|                    | AAV-GFP<br>/ Veh | AAV-Ag<br>/ Veh | AAV-Ag-FL<br>/ Veh | AAV-GFP<br>/ AngII | AAV-Ag<br>/ AngII | AAV-Ag-FL<br>/ AngII |
|--------------------|------------------|-----------------|--------------------|--------------------|-------------------|----------------------|
| <b>Number</b>      | 10               | 10              | 10                 | 10                 | 10                | 10                   |
| <b>HR (bpm)</b>    | 447 ± 27         | 454 ± 27        | 457 ± 28           | 455 ± 32           | 447 ± 33          | 451 ± 30             |
| <b>IVS;d (mm)</b>  | 0.74 ± 0.12      | 0.73 ± 0.08     | 0.70 ± 0.06        | 0.97 ± 0.11*       | 0.87 ± 0.16       | 0.78 ± 0.15#         |
| <b>IVS;s (mm)</b>  | 1.15 ± 0.12      | 1.15 ± 0.12     | 1.09 ± 0.08        | 1.40 ± 0.11*       | 1.22 ± 0.19#      | 0.99 ± 0.15#&        |
| <b>LVID;d (mm)</b> | 3.50 ± 0.17      | 3.58 ± 0.21     | 3.46 ± 0.15        | 3.80 ± 0.26*       | 3.88 ± 0.15       | 3.69 ± 0.25          |
| <b>LVID;s (mm)</b> | 2.19 ± 0.17      | 2.27 ± 0.14     | 2.16 ± 0.14        | 2.86 ± 0.23*       | 2.72 ± 0.20       | 2.45 ± 0.23#&        |
| <b>LVPW;d (mm)</b> | 0.73 ± 0.11      | 0.74 ± 0.06     | 0.69 ± 0.07        | 0.97 ± 0.13*       | 0.78 ± 0.13#      | 0.71 ± 0.12#         |
| <b>LVPW;s (mm)</b> | 1.18 ± 0.17      | 1.21 ± 0.11     | 1.17 ± 0.15        | 1.44 ± 0.12*       | 1.18 ± 0.20#      | 0.98 ± 0.16#&        |
| <b>EF (%)</b>      | 69.7 ± 3.1       | 68.9 ± 3.1      | 69.6 ± 3.2         | 49.7 ± 3.6*        | 57.6 ± 4.8#       | 63.2 ± 6.7#&         |
| <b>FS (%)</b>      | 37.5 ± 1.9       | 36.7 ± 2.4      | 38.8 ± 2.2         | 24.8 ± 2.2*        | 30.4 ± 3.8#       | 33.6 ± 2.6#&         |

Values are means ± SD. HR, heart rate; IVS, interventricular septum (left ventricular anterior wall); LVID, left ventricular interior diameter; LVPW, left ventricular posterior wall; EF, ejection fraction; FS, fraction shortening; d, diastole; s, systole. \* vs AAV-GFP/ Veh,  $p < 0.05$ ; # vs AAV-GFP/ AngII,  $p < 0.05$ ; & vs AAV-Ag/ AngII,  $p < 0.05$ .

**Table S2. The primers list for site-deletion of luciferase plasmids**

| <b>Primers</b>         | <b>Sense primer</b>            | <b>Antisense primer</b>         |
|------------------------|--------------------------------|---------------------------------|
| <b>pLuc-AG-U-105A1</b> | gaagctcctagaaaagtcagtca        | tttctaggagcttctacactgaag        |
| <b>pLuc-AG-U-105A2</b> | gacacaggggacatgtggtttgtagc     | tcccctgtgctgatcaggtagcca        |
| <b>pLuc-AG-U-105A3</b> | ctaatactgtttacaccttttag        | agtattagaattgtttataaatg         |
| <b>pLuc-AG-U-105A</b>  | gaagctcctagaaaagtcagtca        | tttctaggagcttctacactgaag        |
|                        | gacacaggggacatgtggtttgtagc     | tcccctgtgctgatcaggtagcca        |
| <b>pLuc-AG-U-101A</b>  | tggggctcgagaaatctgatgactag     | gagccccattgcctgcaatggtat        |
| <b>pLuc-AG-U-93A1</b>  | ggtgacacaggagagctgccagac       | cctgtgctaccttgagcccact          |
| <b>pLuc-AG-U-93A2</b>  | ttgcaatgggactgtgctcgagaaatc    | ccattgcaatggtattatcaaaaact      |
| <b>pLuc-AG-U-93A</b>   | ggtgacacaggagagctgccagac       | cctgtgctaccttgagcccact          |
|                        | ttgcaatgggactgtgctcgagaaatc    | ccattgcaatggtattatcaaaaact      |
| <b>pLuc-MC-U-105A1</b> | gacaaaatggatttgaacctac         | tttgtcaccaacgttgaattag          |
| <b>pLuc-MC-U-105A2</b> | cctggtgtggactggttatagattataac  | acaccaggctctgcatatacactag       |
| <b>pLuc-MC-U-105A</b>  | gacaaaatggatttgaacctac         | tttgtcaccaacgttgaattag          |
|                        | cctggtgtggactggttatagattataac  | acaccaggctctgcatatacactag       |
| <b>pLuc-MC-U-101A1</b> | ttctagcaacatagcaaaaagaaagtggc  | tgctagaactggactgttaaatcctgggcag |
| <b>pLuc-MC-U-101A2</b> | gcgtgttatgctcccagttccccta      | taacacgcaaaaaggaagtaaaggc       |
| <b>pLuc-MC-U-101A</b>  | ttctagcaacatagcaaaaagaaagtggc  | tgctagaactggactgttaaatcctgggcag |
|                        | gcgtgttatgctcccagttccccta      | taacacgcaaaaaggaagtaaaggc       |
| <b>pLuc-MC-U-93A1</b>  | gtcactagtcacaaaagctcaataaatatc | actagtactggcccctcttccatc        |
| <b>pLuc-MC-U-93A2</b>  | tgacttttagccctgtctactttggc     | aaagtgcacttgggactttgtcaagca     |
| <b>pLuc-MC-U-93A3</b>  | ttaggctgcagataaaaataggc        | agcctaaaggctcacattctgaggc       |
| <b>pLuc-MC-U-93A</b>   | gtcactagtcacaaaagctcaataaatatc | actagtactggcccctcttccatc        |
|                        | ttaggctgcagataaaaataggc        | agcctaaaggctcacattctgaggc       |

**Table S3. The list for miRNA minics used in the cell experiments**

| <b>miRNAs</b> | <b>Species</b> | <b>Cat.</b>     | <b>Company</b>    |
|---------------|----------------|-----------------|-------------------|
| miR-495-5p    | Mouse          | miR10017249-1-5 | Guangzhou RiboBio |
| miR-101a-5p   | Mouse          | miR10004526-1-5 | Guangzhou RiboBio |
| miR-29b       | Mouse          | miR10017063-1-5 | Guangzhou RiboBio |
| miR-105       | Mouse          | miR10004856-1-5 | Guangzhou RiboBio |
| miR-217-3p    | Mouse          | miR10017072-1-5 | Guangzhou RiboBio |
| miR-93-3p     | Mouse          | miR10004636-1-5 | Guangzhou RiboBio |
| miR-448-3p    | Mouse          | miR10001533-1-5 | Guangzhou RiboBio |
| miR-105       | Human          | miR10004516-1-5 | Guangzhou RiboBio |
| miR-101-5p    | Human          | miR10004513-1-5 | Guangzhou RiboBio |
| miR-93-3p     | Human          | miR10004509-1-5 | Guangzhou RiboBio |

**Table S4. The list for miRNA inhibitors used in the cell experiments**

| <b>miRNAs</b> | <b>Species</b> | <b>Cat.</b>     | <b>Company</b>    |
|---------------|----------------|-----------------|-------------------|
| miR-495-5p    | Mouse          | miR20017249-1-5 | Guangzhou RiboBio |
| miR-101a-5p   | Mouse          | miR20004526-1-5 | Guangzhou RiboBio |
| miR-29b       | Mouse          | miR20017063-1-5 | Guangzhou RiboBio |
| miR-105       | Mouse          | miR20004856-1-5 | Guangzhou RiboBio |
| miR-217-3p    | Mouse          | miR20017072-1-5 | Guangzhou RiboBio |
| miR-93-3p     | Mouse          | miR20004636-1-5 | Guangzhou RiboBio |
| miR-448-3p    | Mouse          | miR20001533-1-5 | Guangzhou RiboBio |

**Table S5. The primers list for site-deletion AAVs**

| <b>Primers</b>    | <b>Sense primer</b>           | <b>Antisense primer</b>          |
|-------------------|-------------------------------|----------------------------------|
| <b>AAV-Ag-UA</b>  | gaagctcctagaaagtcagtca        | tttctaggagcttctactgaag           |
|                   | gacacaggggacatgtggtttgtagc    | tcccctgtgctgatcaggtagcca         |
|                   | tggggctcgagaaatctgatgactag    | gagccccattgcctgcaatggtat         |
|                   | ggtgacacaggagagctgccagac      | cctgtgtcaccttgagcccact           |
|                   | ttgcaatgggactgtgctcgagaaatc   | ccattgcaatggtattatcaaaact        |
| <b>AAV-Mc-UA</b>  | gacaaaatggatttgaacctac        | tttgtcaccaacgttgaattag           |
|                   | cctggtgtggactggtatagattataac  | acaccaggctctgcataatacactag       |
|                   | ttctagcaacatagcaaaaagaaagtggc | tgctagaactggactgttaaaatcctgggcag |
|                   | gcgtgttatgctcccagttccccta     | taacagccaaaaggaagtaaggc          |
|                   | gtcactagtcacaaagctcaataaatac  | actagtactggcccctctccatc          |
|                   | ttaggctgcagataaaaataggc       | agcctaaggtcacattctgaggc          |
| <b>AAV-Ag-FLA</b> | gaagctcctagaaagtcagtca        | tttctaggagcttctactgaag           |
|                   | gacacaggggacatgtggtttgtagc    | tcccctgtgctgatcaggtagcca         |
|                   | tggggctcgagaaatctgatgactag    | gagccccattgcctgcaatggtat         |
|                   | ggtgacacaggagagctgccagac      | cctgtgtcaccttgagcccact           |
|                   | ttgcaatgggactgtgctcgagaaatc   | ccattgcaatggtattatcaaaact        |
| <b>AAV-Mc-FLA</b> | gacaaaatggatttgaacctac        | tttgtcaccaacgttgaattag           |
|                   | cctggtgtggactggtatagattataac  | acaccaggctctgcataatacactag       |
|                   | ttctagcaacatagcaaaaagaaagtggc | tgctagaactggactgttaaaatcctgggcag |
|                   | gcgtgttatgctcccagttccccta     | taacagccaaaaggaagtaaggc          |
|                   | gtcactagtcacaaagctcaataaatac  | actagtactggcccctctccatc          |
|                   | ttaggctgcagataaaaataggc       | agcctaaggtcacattctgaggc          |

**Table S6. The primers list for miRNAs levels using realtime PCR assays**

| <b>miRNAs</b> | <b>Species</b> | <b>Cat.</b>     | <b>Company</b>    |
|---------------|----------------|-----------------|-------------------|
| miR-495-5p    | Mouse          | miRQ0017249-1-1 | Guangzhou RiboBio |
| miR-101a-5p   | Mouse          | miRQ0004526-1-1 | Guangzhou RiboBio |
| miR-29b       | Mouse          | miRQ0017063-1-1 | Guangzhou RiboBio |
| miR-105       | Mouse          | miRQ0004856-1-1 | Guangzhou RiboBio |
| miR-217-3p    | Mouse          | miRQ0017072-1-1 | Guangzhou RiboBio |
| miR-93-3p     | Mouse          | miRQ0004636-1-1 | Guangzhou RiboBio |
| miR-448-3p    | Mouse          | miRQ0001533-1-1 | Guangzhou RiboBio |

**Table S7. The primers list for mRNAs levels using realtime PCR assays**

| <b>Gene</b>    | <b>Species</b> | <b>Sense primer</b>       | <b>Antisense primer</b>     |
|----------------|----------------|---------------------------|-----------------------------|
| Mcl1           | Mouse          | TGTAAGGACGAAACGGGACT      | AAAGCCAGCAGCACATTTCT        |
| Aggf1          | Mouse          | AGCACACGGAGCGACTCTA       | GAGCACACTGACTCTGCTGT        |
| Anp            | Mouse          | TTCTTCCTCGTCTTGGCCTTT     | GACCTCATCTTCTACCGGCATCT     |
| Bnp            | Mouse          | CACCGCTGGGAGGTCACT        | GTGAGGCCTTGGTCCTTCAAGGTCACT |
| $\beta$ -Mhc   | Mouse          | ATGTGCCGGACCTTGGAA        | CCTCGGGTTAGCTGAGAGATCA      |
| Col1a2         | Mouse          | GTAACCTTCGTGCCTAGCAACA    | CCTTTGTCAGAATACTGAGCAGC     |
| ColIVa1        | Mouse          | CTGGCACAAAAGGGACGAG       | ACGTGGCCGAGAATTTACC         |
| Ctgf           | Mouse          | GGGCCTCTTCTGCGATTTT       | ATCCAGGCAAGTGCATTGGTA       |
| Mcp1           | Mouse          | GCTCAGCCAGATGCAGTTAA      | TCTTGAGCTTGGTGACAAAACT      |
| Tnf $\alpha$   | Mouse          | CACGTCGTAGCAAACCACCAAGTGA | TGGGAGTAGACAAGGTACAACCC     |
| Il6            | Mouse          | TCTATACCACTTCACAAGTCGGA   | GAATTGCCATTGCACAACCTTTT     |
| Bcl-2          | Mouse          | CCTGGCTGTCTCTGAAGACC      | CTCACTTGTGGCCCAGGTAT        |
| Bax            | Mouse          | CCCGAGAGGTCTTTTTCC        | GCCTTGAGCACCAGTTTG          |
| $\beta$ -actin | Mouse          | CATCGTCCACCGCAAATG        | CACCTTCACCGTTCCAGTT         |
